# Supplementary material for: A novel variant of social spider optimization using single centroid representation and enhanced mating for data clustering
Source: PeerJ journal article supplement (doi:10.7717/peerj-cs.201), 2019-07-22
Supplement: ssodcsc.pdf [file ssodcsc.pdf]

```

import java.util.*;
import java.io.*;
import java.util.Random;
import java.util.HashSet;
import java.util.Random;
public class ssodcsc
{
static int k=1;
static int n=50;
static double pf=0.7;
static int maxiter=400;
    static int globalmin=100000000;
static double[][] f=new double[k][100];
double avgweight1=0.0;
double avgweight2=0.0;

static int k1=6;

static String[][] cclass=
{
    {
"glass1.txt","glass2.txt","glass3.txt","glass4.txt","glass5.txt","glass6.
txt","glass7.txt","glass8.txt","glass9.txt","glass10.txt",
"glass11.txt","glass12.txt","glass13.txt","glass14.txt","glass15.txt","gl
ass16.txt","glass17.txt","glass18.txt","glass19.txt","glass20.txt",
"glass21.txt","glass22.txt","glass23.txt","glass24.txt","glass25.txt","gl
ass26.txt","glass27.txt","glass28.txt","glass29.txt","glass30.txt",
"glass31.txt","glass32.txt","glass33.txt","glass34.txt","glass35.txt","gl
ass36.txt","glass37.txt","glass38.txt","glass39.txt","glass40.txt",
"glass41.txt","glass42.txt","glass43.txt","glass44.txt","glass45.txt","gl
ass46.txt","glass47.txt","glass48.txt","glass49.txt","glass50.txt",
"glass51.txt",
"glass52.txt","glass53.txt","glass54.txt","glass55.txt","glass56.txt","gl
ass57.txt","glass58.txt","glass59.txt",
"glass60.txt","glass61.txt","glass62.txt","glass63.txt","glass64.txt","gl
ass65.txt","glass66.txt","glass67.txt","glass68.txt","glass69.txt",
"glass70.txt"
    },

{
"glass71.txt","glass72.txt","glass73.txt","glass74.txt","glass75.txt","gl
ass76.txt","glass77.txt","glass78.txt","glass79.txt","glass80.txt",
"glass81.txt","glass82.txt","glass83.txt","glass84.txt","glass85.txt","gl
ass86.txt","glass87.txt","glass88.txt","glass89.txt","glass90.txt",
"glass91.txt","glass92.txt","glass93.txt","glass94.txt","glass95.txt","gl
ass96.txt","glass97.txt","glass98.txt","glass99.txt","glass100.txt",
"glass101.txt","glass102.txt","glass103.txt","glass104.txt","glass105.txt
","glass106.txt","glass107.txt","glass108.txt","glass109.txt",
"glass110.txt","glass111.txt","glass112.txt","glass113.txt","glass114.txt
","glass115.txt","glass116.txt","glass117.txt","glass118.txt",
"glass119.txt","glass120.txt", "glass121.txt",
"glass122.txt","glass123.txt","glass124.txt","glass125.txt","glass126.txt
","glass127.txt",

```

```

"glass128.txt", "glass129.txt", "glass130.txt", "glass131.txt", "glass132.txt
", "glass133.txt", "glass134.txt", "glass135.txt", "glass136.txt",
"glass137.txt", "glass138.txt", "glass139.txt",
"glass140.txt", "glass141.txt", "glass142.txt", "glass143.txt", "glass144.txt
", "glass145.txt",
"glass146.txt"
    },
{
"glass147.txt", "glass148.txt", "glass149.txt", "glass150.txt", "glass151.txt
", "glass152.txt", "glass153.txt", "glass154.txt", "glass155.txt", "glass156.t
xt",
"glass157.txt", "glass158.txt", "glass159.txt", "glass160.txt", "glass161.txt
", "glass162.txt", "glass163.txt"
},
{
"glass164.txt", "glass165.txt", "glass166.txt",
"glass167.txt", "glass168.txt", "glass169.txt", "glass170.txt", "glass171.txt
", "glass172.txt", "glass173.txt", "glass174.txt", "glass175.txt", "glass176.t
xt"
},
{
"glass177.txt", "glass178.txt", "glass179.txt", "glass180.txt", "glass181.txt
", "glass182.txt", "glass183.txt", "glass184.txt", "glass185.txt"
},
{
"glass186.txt", "glass187.txt", "glass188.txt", "glass189.txt", "glass190.txt
", "glass191.txt", "glass192.txt", "glass193.txt", "glass194.txt",
"glass195.txt", "glass196.txt", "glass197.txt", "glass198.txt", "glass199.txt
", "glass200.txt", "glass201.txt", "glass202.txt", "glass203.txt",
"glass204.txt", "glass205.txt", "glass206.txt", "glass207.txt", "glass208.txt
", "glass209.txt", "glass210.txt", "glass211.txt", "glass212.txt",
"glass213.txt", "glass214.txt"
}
};

```

```

static String[][] cluster= new String[200][200];

```

```

    static ArrayList<Map<double[], TreeSet<Integer>>> sp;
    static ArrayList<Map<double[], TreeSet<Integer>>> spresult;

    static ArrayList<Integer> dmalpos;
    static ArrayList<Integer> dfmalpos;
    static Map<double[], TreeSet<Integer>> best1;
    static Map<double[], TreeSet<Integer>> best3;

    static Map<double[], TreeSet<Integer>> best2;
    static ArrayList<String> global = new ArrayList<String>();

    static int nf= (int) (n * (0.90- Math.random()*0.35));
    static int nm=n-nf;
    static double[] fitness;

```

```

        static double[] weight;
        static double[] vib;
        static int gbest;
        static int lbest;
        static int fbest;
        static int cf=0;
        static int ct=0;
static ArrayList<double[]> vecspace = new ArrayList<double[]>();

        static int index=-1;

        static Map<double[], TreeSet<Integer>> temp1;
        static Map<double[], TreeSet<Integer>>
temp2;

        static Map<double[], TreeSet<Integer>>
temp3;

    public static void main(String[]args) throws
IOException,InterruptedException

    {
        long starttime = System.nanoTime();

        //read in documents from all .txt files in same folder as sso.java
        //save parallel lists of documents (String[]) and their filenames,
and create global set list of words
        ArrayList<String[]> docs = new ArrayList<String[]>();
        ArrayList<String> filenames = new ArrayList<String>();
        //int maxiter=10;

        File folder = new File(".");
        // no.of. txt files
        List<File> files = Arrays.asList(folder.listFiles(new
FileFilter() {
            public boolean accept(File f) {
                return f.isFile() && f.getName().endsWith(".txt");
            }
        }));
        BufferedReader in = null;
        for(File f:files){
            in = new BufferedReader(new FileReader(f));

            StringBuffer sb = new StringBuffer();
            String s = null;
            while((s = in.readLine()) != null){
                sb.append(s);
            }
        }
    }

```

```

    }
    //input cleaning regex
    String[] d =
sb.toString().replaceAll("[\\W&&[^\s]]", "").split("\\W+");
    for(String u:d)
        if(!global.contains(u))
            {
                global.add(u);
                ct++;
            }
    docs.add(d);
    filenames.add(f.getName());
    cf++;
}

    System.out.println("terms="+ ct + "filess="+ cf);

//

    //compute tf-idf and create document vectors (double[])

for(String[] s:docs){
    double[] d = new double[global.size()];
    for(int i=0;i<global.size();i++)
        d[i] = tf(s,global.get(i)) * idf(docs,global.get(i));
    vecspace.add(d);
}

    for(double[] obj:vecspace)
    {
        for(int i=0;i<global.size();i++)
            System.out.print(obj[i] + " ");
        System.out.println();
    }

System.out.println("***** vector space
representation of text files is
over*****");

    //ArrayList<Map<double[], TreeSet<Integer>>> sp = new
ArrayList<Map<double[], TreeSet<Integer>>>();

    for(int ss=1;ss<=maxiter;ss++)
    {
        sp = new ArrayList<Map<double[], TreeSet<Integer>>>();
        dmalpos = new ArrayList<Integer>();
        dfmalpos = new ArrayList<Integer>();
    }
}

```

```

fitness = new double[n];
    weight = new double[n];
    vib = new double[3];

for(int j=1;j<= n;j++)
{
    if (j<=nf)
        System.out.println("initialization of  female spider"
+ j);
    else
        System.out.println("initialization of  male spider" +
(j-nf));
        HashMap<double[],TreeSet<Integer>> clusters = new
HashMap<double[],TreeSet<Integer>>();
        HashMap<double[],TreeSet<Integer>> step = new
HashMap<double[],TreeSet<Integer>>();
        HashSet<Integer> rand = new HashSet<Integer>();
        // TreeMap<Double,HashMap<double[],TreeSet<Integer>>> errorsums
= new TreeMap<Double,HashMap<double[],TreeSet<Integer>>>();
        // no.of clusters in each spider

        clusters.clear();
        step.clear();
        rand.clear();
        //randomly initialize cluster centers
        while(rand.size()< k)
            rand.add((int) (Math.random()*vecspace.size()));
        for(int r:rand){
            double[] temp = new double[vecspace.get(r).length];
            System.arraycopy(vecspace.get(r),0,temp,0,temp.length);
            step.put(temp,new TreeSet<Integer>());
        }

        for(Map.Entry m:step.entrySet()){
            double[] c= (double[])
m.getKey();
            for(int
i=0;i<global.size();i++)
                System.out.print(c[i] + "  ");

            System.out.println(m.getValue());
        }
}

```



```
ArrayList<double[]>();
```

```
(double[]) itr.next();
```

```
p=0;p<global.size();p++)
```

```
cent[p]) * (obj[p] - cent[p]);
```

```
Math.sqrt(sum);
```

```
t= s.get(dmincent);
```

```
s.put(dmincent,t);
```

```
t= new TreeSet<Integer>();
```

```
ArrayList<double[]> cc= new
```

```
while(itr.hasNext())  
{
```

```
double[] cent=
```

```
cc.add(cent);  
double sum=0.0;
```

```
for(int
```

```
sum += (obj[p] -
```

```
double d=
```

```
if(d <= dmin)  
{
```

```
dmin=d;
```

```
dmincent=cent;
```

```
}
```

```
}
```

```
if(s.get(dmincent)!=null)
```

```
{
```

```
TreeSet<Integer>
```

```
t.add(j);
```

```
}
```

```
else
```

```
{
```

```
TreeSet<Integer>
```

```
t.add(j);
```

```

s.put(dmincent,t);
}

sp.set(i,s);
}

// System.out.println(sp.get(i));
}

// step2    caculate fitness of each spider
cal_fitness();

// step3    calculate weight of each spider
cal_weight();

int ii;
localmin=100000000;
for(ii=0;ii<=n-1;ii++)
{
    if( fitness[ii]<localmin)
    {
        localmin=fitness[ii];
        index=ii;
        best1 =sp.get(index);
    }
}
// System.out.println("local best in iteration" +
iter + best1);

if( globalmin>localmin)
{
    globalmin=localmin;
    gindex=index;
    best2=sp.get(gindex);
}

```



```

        if(iter==maxiter)
            break;

//    step4    calculate next positions of female spiders
                female_next_pos();

//    step5    calculate next positions of male spiders
                male_next_pos();

//    step6    perform mating operation
                mating();

    }

}

for(int i=0; i<=k1-1;i++)
{
    Map<double[], TreeSet<Integer>> s = spresult.get(i);
    Collection c = s.keySet();

    Iterator itr = c.iterator();

    int i=0;
    int[] cs =new int[10];

    while(itr.hasNext())
    {
        System.out.println("cluster " + (i+1) +
"contains");
        double[] cent= (double[]) itr.next();

        TreeSet<Integer> t = s.get(cent);

        Iterator<Integer> it = t.iterator();
        int j2=0;
        while(it.hasNext())
        {
            Integer j= it.next();
            //System.out.println(vecspace.get(j));
            cluster[i][j2]=filenames.get(j);
        }
    }
}

```

```

        System.out.println(cluster[i][j2]);
        j2++;
    }
    cs[i]=j2;

    i++;
    System.out.println();
}

}

long estimatedtime= System.nanoTime()-starttime;
System.out.println("elapsed time =" + estimatedtime);

double fmeasure=0;

for(int m=0;m<=k-1;m++)
{
    for(int j=0;j<=k-1;j++)
    {
        double a1 =0;
        for(int
ni=0;i<cluster[j].length;ni++)
            {
                for(int
ii=0;ii<cclass[m].length;ii++)
                    {
                        if
((cclass[m][ii]!=null) &&(cluster[j][ni]!=null) &&
(cclass[m][ii].equals(cluster[j][ni])))
                            {
                                a1++;
                                break;
                            }
                    }
            }

        double b1= cclass[m].length-a1;
        double c1= cluster[j].length-a1;
        double d1= cf-(a1+c1);
        double recall=a1/(a1+b1);
        double prec=a1/(a1+c1);

        if((recall+prec)!=0)

            f[m][j] =
(2*recall*prec)/(recall+prec);

```

```

else
    f[m][j]=0;
}

double max = f[m][0];
for(int jj=1;jj<=k-1;jj++)
{
    if(f[m][jj]>max)
        max=f[m][jj];
}

fmeasure +=((double)cclass[m].length/cf) *max;
}

System.out.println("F-measure of our clustering algorithm " +
fmeasure);

double accuracy=0;
double max =0;

for(int m=0;m<=k-1;m++)
{
    max =0;
    for(int j=0;j<=k-1;j++)
    {
        double a1 =0;
        for(int
ni=0;ni<cluster[j].length;ni++)
        {
            for(int
ii=0;ii<cclass[m].length;ii++)
            {
                if
((cclass[m][ii]!=null) &&(cluster[j][ni]!=null) &&
(cclass[m][ii].equals(cluster[j][ni])))
                {
                    a1++;
                    break;
                }
            }
        }

        double b1= 50-a1;

```

```

        double c1= cs[j]-a1;
        double d1= 150-(a1 +b1+c1);
        if ( (a1 + d1)/(a1+b1+c1+d1) >max)
            max =(a1 + d1)/(a1+b1+c1+d1);
    }

    accuracy += max;
}

System.out.println("Accuracy =" +accuracy/k1);
}

static void find_cos_sim( Map<double[], TreeSet<Integer>> best3)
{
    double avg=0;

    Map<double[], TreeSet<Integer>> s = best3;
    Collection c = s.keySet();

    Iterator itr = c.iterator();

    int i=0;
    double[] sim= new double[k];

    while(itr.hasNext())
    {
        sim[i]=0;

        double[] cent= (double[]) itr.next();

        TreeSet<Integer> t = s.get(cent);

        Iterator<Integer> it = t.iterator();

        while(it.hasNext())
        {
            Integer j= it.next();
            double[] cent1=vecspace.get(j);

            TreeSet<Integer> t1 = s.get(cent);

            Iterator<Integer> it1 =
t1.iterator();

```

```

                                while(it1.hasNext())
                                {
                                    Integer j1= it1.next();
                                    double[]
cent2=vecspace.get(j1);
                                    sim[i] += cosSim(cent1,cent2);
                                }
                                }
                                sim[i] /=(t.size()*t.size());
                                i++;
                            }

                            for(int ii=0;ii<=k-1;ii++)
                            {
                                avg +=sim[ii];
                            }
                            avg=avg/k1;

                            System.out.println("average cosine similarity= " + avg);

                    }

```

```

static double cosSim(double[] a, double[] b){
double dotp=0, maga=0, magb=0;
for(int i=0;i<a.length;i++){
    dotp+=a[i]*b[i];
    maga+=Math.pow(a[i],2);
    magb+=Math.pow(b[i],2);
}
}

```

```

    maga = Math.sqrt(maga);
    magb = Math.sqrt(magb);
    double d = dotp / (maga * magb);
    return d==Double.NaN?0:d;
}

static void cal_fitness()
{
    for( int i=0;i<=n-1;i++)
    {
        double[] sum = new double[k];
        Map<double[], TreeSet<Integer>> s1=sp.get(i);

        Iterator itr1 = s1.keySet().iterator();
        fitness[i]=0;

        int nc=0;
        for(;itr1.hasNext();)
        {

            double[] cent1= (double[]) itr1.next();
            sum[nc]=0;

            TreeSet<Integer> ts= s1.get(cent1);

            Iterator<Integer> itr = ts.iterator();

            while(itr.hasNext())
            {
                Integer j= itr.next();

                double[] cent2 = vecspace.get(j);
                double d=0.0;
                for(int p=0;p<=global.size()-1;p++)
                    d += (cent1[p]-cent2[p]) * (cent1[p]-
cent2[p]);

                d=Math.sqrt(d);
                sum[nc] +=d;
            }

            if (ts.size()!=0)
                sum[nc] /=ts.size();

            nc++;

            if(nc>k1-1)
                break;
        }

        for(int j=0;j<=k1-1;j++)

```

```

        fitness[i] +=sum[j];

        // System.out.println(" fitness of spider " + (i+1) + " is "
+ fitness[i]);
    }
}

static void cal_weight()

{
    //
System.out.println("*****
*****
***");
    // System.out.println(" weights of
spiders ");

    double minfitness=100000;
    double maxfitness=0.0;
    for(int i=0;i<=n-1;i++)
    {
        if (fitness[i] < minfitness)
            minfitness=fitness[i];
        if (fitness[i] > maxfitness)
            maxfitness=fitness[i];
    }

    for(int i=0;i<=n-1;i++)
    {
        weight[i]= ( fitness[i] - minfitness) / (
maxfitness - minfitness);
        // System.out.println(" weight of spider " + (i+1) +
" is " + weight[i]);
    }
}
}

```

```

static double tf(String[] doc, String term){
    double n = 0;
    for(String s:doc)
        if(s.equalsIgnoreCase(term))
            n++;
    return n/doc.length;
}

```

```

static double idf(ArrayList<String[]> docs, String term){
    double n = 0;
    for(String[] x:docs)
        for(String s:x)
            if(s.equalsIgnoreCase(term)){
                n++;
                break;
            }
    return Math.log(docs.size()/n);
}

static void vibper( int i)
{
    double bestweight=1;

    for(int j=0;j<=n-1;j++)
    {
        if (weight[j] < bestweight)
        {
            bestweight=weight[j];
            gbest=j;
        }
    }

    vib[0]= weight[gbest] * Math.exp( -
Math.pow(distance(sp.get(gbest), sp.get(i)),2));
    // System.out.println(" intensity of vibration from global best
spider for spider " + (i+1) + " " + vib[0]);

    double mind=0;
    for(int j=0;j<=n-1;j++)
    {
        double d=distance(sp.get(i),sp.get(j));
        if( d < mind)
            mind= d;
    }

    for(int j=0;j<=n-1;j++)
    {
        if (weight[j] < weight[i] &&
distance(sp.get(i),sp.get(j))== mind)
        {

            lbest=j;
        }
    }

    vib[1]= weight[lbest] * Math.exp( -
Math.pow(distance(sp.get(lbest), sp.get(i)),2));
    // System.out.println(" intensity of vibration from local best
spider for spider " + (i+1) + " " + vib[1]);
}

```



```

        mind=0;
    for(int j=0;j<=nf-1;j++)
    {
        double d=distance(sp.get(i),sp.get(j));
        if( d < mind)
            mind= d;
    }

    for(int j=0;j<=nf-1;j++)
    {
        if (weight[j] < weight[i] &&
distance(sp.get(i),sp.get(j))== mind)
        {

            fbest=j;
        }
    }

    vib[2]= weight[fbest] * Math.exp( -
Math.pow(distance(sp.get(fbest), sp.get(i)),2));
    // System.out.println(" intensity of vibration from nearer female
spider for spider " + (i+1) + "      " + vib[2]);

}

    static double distance(Map<double[], TreeSet<Integer>> s1,
Map<double[], TreeSet<Integer>> s2)
    {

        Iterator itr1 =
s1.keySet().iterator();
        Iterator itr2 =
s2.keySet().iterator();

        System.out.println();

        double sum=0.0;

    for(;itr1.hasNext() &&itr2.hasNext();)
        {

```

```

(double[]) itr1.next();
(double[]) itr2.next();

System.out.println();

p=0;p<global.size();p++)
    (cent1[p] - cent2[p]) * (cent1[p] - cent2[p]);

double[] cent1=
double[] cent2=

for(int
    sum +=
}

return Math.sqrt(sum);

}

```

```

static Map<double[], TreeSet<Integer>> add(Map<double[],
TreeSet<Integer>> s1, Map<double[], TreeSet<Integer>> s2)
{
    HashMap<double[], TreeSet<Integer>> temp =
new HashMap<double[], TreeSet<Integer>>();

    Iterator itr1 = s1.keySet().iterator();
    Iterator itr2 = s2.keySet().iterator();

```

```

for(;itr1.hasNext() && itr2.hasNext());
{

double[] cent1=
(double[]) itr1.next();
double[] cent2=
(double[]) itr2.next();
double[] cent3=
new double[global.size()];

for(int
{
cent3[p]= cent1[p] + cent2[p];
}
}

```

```

temp.put (cent3,new TreeSet<Integer>());
    }

    return temp;

}

```

```

    static Map<double[], TreeSet<Integer>> minus(Map<double[],
TreeSet<Integer>> s1, Map<double[], TreeSet<Integer>> s2)
    {
        HashMap<double[], TreeSet<Integer>> temp = new HashMap<double[],
TreeSet<Integer>>();

        Iterator itr1 = s1.keySet().iterator();
        Iterator itr2 = s2.keySet().iterator();

        for(;itr1.hasNext() && itr2.hasNext();)
            {

                double[] cent1=
                (double[]) itr1.next();

                double[] cent2=
                (double[]) itr2.next();

                double[] cent3=
                new double[global.size()];

                for(int
                p=0;p<global.size();p++)
                {
                    cent3[p]= cent1[p] - cent2[p];
                }

                temp.put (cent3,new TreeSet<Integer>());
            }

        return temp;
    }

```

```

    }

    static Map<double[], TreeSet<Integer>> addr(Map<double[],
TreeSet<Integer>> s1, double r)
    {
        HashMap<double[], TreeSet<Integer>> temp = new
HashMap<double[], TreeSet<Integer>>();

        Iterator itr1 = s1.keySet().iterator();

        for(;itr1.hasNext();)
        {

            double[] cent1=
(double[]) itr1.next();

            double[] cent3=
new double[global.size()];

            for(int
p=0;p<global.size();p++)
            {
                cent3[p]= cent1[p] + r;
            }

            temp.put(cent3,new TreeSet<Integer>());
        }

        return temp;
    }

    static Map<double[], TreeSet<Integer>> mulr(Map<double[],
TreeSet<Integer>> s1, double r)
    {
        HashMap<double[], TreeSet<Integer>> temp = new
HashMap<double[], TreeSet<Integer>>();

```

```

        Iterator itr1 = s1.keySet().iterator();

        for(;itr1.hasNext();)
        {

            double[] cent1=
(double[]) itr1.next();

            double[] cent3=
new double[global.size()];

            for(int
p=0;p<global.size();p++)
            {

                cent3[p]= cent1[p] * r;

            }

            temp.put(cent3,new TreeSet<Integer>());
        }

        return temp;

    }

```

```

    static void female_next_pos()
    {
        double r;

        for(int i=0;i<=nf-1;i++)
        {

            vibper(i);
            Map<double[], TreeSet<Integer>> s1 =
sp.get(i);
            Map<double[], TreeSet<Integer>> s2 =
sp.get(gbest);
            Map<double[], TreeSet<Integer>> s3 =
sp.get(lbest);
            r= Math.random();

```

```

        if( r > pf)
        {

                                temp1 = mulr(mulr(minus(s3,s1),vib[1]),
beta() );
                                temp2 = mulr(mulr(minus(s2,s1),vib[0]),
beta());
                                temp3=
addr(add(add(s1,temp1),temp2),beta()) ;

        }

        else
        {
                                temp1 =
mulr(mulr(minus(s3,s1),vib[1]),beta());
                                temp2 =
mulr(mulr(minus(s2,s1),vib[0]),beta());
                                temp3=
addr(minus(minus(s1,temp1),temp2),beta()) ;

        }

                                /* r= Math.random();

                                if(r>pf)
                                sp.set(i,temp3);
                                else
                                centroids(i);*/
}
}

```

```

static void male_next_pos()
{
    double[] mweight = new double[n-nf];
    double median;
    for(int i=nf,j=0; i<=n-1; i++,j++)
        mweight[j]=weight[i];

    Arrays.sort(mweight);

    if (mweight.length % 2 == 0)
        median = ( mweight[mweight.length/2] +
mweight[mweight.length/2 - 1]) / 2;
    else
        median = mweight[mweight.length/2];
}

```

```

        for(int i=nf;i<=n-1;i++)
        {
            if( weight[i]> median)
                dmalpos.add(i);
        }

        for(int i=nf; i<=n-1;i++)
        {
            Map<double[], TreeSet<Integer>> s1 =
sp.get(i);

            if(dmalpos.contains(i))
            {
                vibper(i);

                Map<double[], TreeSet<Integer>>

s2 = sp.get(fbest);

                temp1=      mulr( mulr(
minus(s2,s1),vib[2]),beta());
                temp2= addr(temp1,0.34);

                temp3= add(temp2,s1);

//sp.set(i,temp3);

            }

            else
            {
                temp1 = minus( weight_mean_male(),
sp.get(i));
                temp2 = mulr(temp1, beta());

                temp3= add(temp2,sp.get(i));

                // sp.set(i,temp3);
            }

            /* double r= Math.random();

                if(r<pf)
                sp.set(i,temp3);
                else
                centroids(i);*/

        }

    }
}

```

```

weight_mean_male()
    static Map<double[], TreeSet<Integer>>
    {
        double denominator =0.0;

        Map<double[], TreeSet<Integer>> numerator
= mulr(sp.get(nf),weight[nf]);

        for(int i=nf; i<=n-1;i++)
        {
            denominator += weight[i];
        }

        for(int i=nf+1;i<=n-1;i++)
        {
            numerator
=add(numerator,mulr(sp.get(i),weight[i]));
        }

        return mulr(numerator,1/denominator);
    }

    static void mating()
    {
        for(int i=nf; i<=n-1;i++)
        {

int worst=index_of_worst();
Map<double[], TreeSet<Integer>>  sworst = sp.get(worst);
find_dfmalpos();
Map<double[], TreeSet<Integer>> snew= find_new(i);
snew=assign_to(snew);
double fnew= find_fitness(snew);
double wnew= find_weight(snew,fnew);
if(wnew < weight[worst]) //1

```



```
sp.set(worst, snew);
```

```
    }
```

```
  }
```

```
static int index_of_worst()  
{
```

```
    double max=0;//2  
    int index=-1;  
    for(int i=0;i<=n-1;i++)  
    {  
        if( weight[i] > max) //3  
        {  
            max=weight[i]; //4  
            index=i;  
        }  
    }
```

```
    return index;  
}
```

```
static double find_fitness(Map<double[],  
TreeSet<Integer>> s1)  
{  
    double[] sum = new double[k];  
  
    Iterator itr1 = s1.keySet().iterator();  
    double fitness=0;  
  
    int nc=0;  
    for(;itr1.hasNext();)  
    {  
        double[] cent1= (double[]) itr1.next();  
        sum[nc]=0;  
  
        TreeSet<Integer> ts= s1.get(cent1);
```

```

        Iterator<Integer> itr = ts.iterator();

        while(itr.hasNext())
        {
            Integer j= itr.next();

            double[] cent2 = vecspace.get(j);
            double d=0.0;
            for(int p=0;p<=global.size()-1;p++)
                d += (cent1[p]-cent2[p]) * (cent1[p]-
cent2[p]);

            d=Math.sqrt(d);
            sum[nc] +=d;
        }

        if (ts.size()!=0)
            sum[nc] /=ts.size();

        nc++;

        if(nc>k1-1)
            break;
    }

    for(int j=0;j<=k1-1;j++)
        fitness +=sum[j];

    return fitness;

}

```

```

    static double find_weight(Map<double[],
TreeSet<Integer>> s, double f)
    {
        double minfitness=100000;
        double maxfitness=0.0;
        for(int i=0;i<=n-1;i++)
        {
            if (fitness[i] < minfitness)
                minfitness=fitness[i];
            if (fitness[i] > maxfitness)
                maxfitness=fitness[i];
        }
    }

```

```

        double weight= ( f - minfitness) / (
maxfitness - minfitness);

        return weight;

    }

    static Map<double[], TreeSet<Integer>>
assign_to(Map<double[], TreeSet<Integer>> s)
    {

        double d=0.0;

        for(int j=0;j<=cf-1;j++)
        {
            double[] dmincent = new
double[global.size()];

            double[] obj=
vecspace.get(j);

            Collection c = s.keySet();

            Iterator itr = c.iterator();
            double dmin=10000;
            ArrayList<double[]> cc= new
ArrayList<double[]>();

            while(itr.hasNext())
            {
                double[] cent=
(double[]) itr.next();

                cc.add(cent);
                double sum=0.0;

                for(int
p=0;p<global.size();p++)
                    sum += (obj[p] -
cent[p]) * (obj[p] - cent[p]);

                d= Math.sqrt(sum);

                if(d <= dmin)
                {

```

```

        dmin=d;
        dmincent=cent;
    }
}

if(s.get(dmincent)!=null)
{
    TreeSet<Integer> t=
s.get(dmincent);
        t.add(j);
        s.put(dmincent,t);
    }
else
{
        TreeSet<Integer> t=
new TreeSet<Integer>();
        t.add(j);
        s.put(dmincent,t);
    }
}
return s;
}

```

```

static Map<double[], TreeSet<Integer>> find_new(int i)
{
    double sw=weight[i];
    for(int j=0;j<=dfmalpos.size()-1;j++)
    {
        int index =dfmalpos.get(j);
        sw +=weight[index];
    }

    Map<double[], TreeSet<Integer>> snew =
mulr(sp.get(i),weight[i]/sw);

    for(int j=0;j<=dfmalpos.size()-1;j++)
    {
        snew = add(snew,
mulr(sp.get(dfmalpos.get(j)),weight[dfmalpos.get(j)]/sw));
    }

    return snew;
}

```

```

    }

static void centroids(int i)
{
    Map<double[], TreeSet<Integer>> s=sp.get(i);
    HashMap<double[], TreeSet<Integer>> ns = new
HashMap<double[],TreeSet<Integer>>();
    Collection c = s.keySet();
    double[] ncent =new double[global.size()];
    ArrayList<double[]> acent= new ArrayList<double[]>();
    ArrayList<double[]> ancent= new ArrayList<double[]>();

    Iterator itr = c.iterator();
    while(itr.hasNext())
    {
        double[] cent= (double[]) itr.next();

        TreeSet<Integer> ts= s.get(cent);
        for(int p=0;p<global.size();p++)
        {
            ncent[p]=0;
        }

        Iterator<Integer> itr1 = ts.iterator();

        while(itr1.hasNext())
        {
            Integer j= itr1.next();

            double[] cent1 = vecspace.get(j);

            for(int p=0;p<global.size();p++)
            {
                ncent[p] +=cent1[p];
            }

            for(int p=0;p<global.size();p++)
            {
                ncent[p] /= ts.size();
            }
            ns.put(ncent,new TreeSet<Integer>());
        }

    sp.remove(i);
    sp.add(ns);

}

```

```
static double beta()
{
    int a=40,b=100;

    double[] r= new double[141];
    for(int i=0;i<=140;i++)
    {
        r[i]= Math.random();
    }

    Arrays.sort(r);

    return r[39];
}
```

```
}
```
